# Supplementary figures and images for: Dynamic modulation of activity in cerebellar nuclei neurons during pavlovian eyeblink conditioning in mice
Source: eLife journal article supplement (doi:10.7554/elife.28132), 2017-12-15

Figure 1S

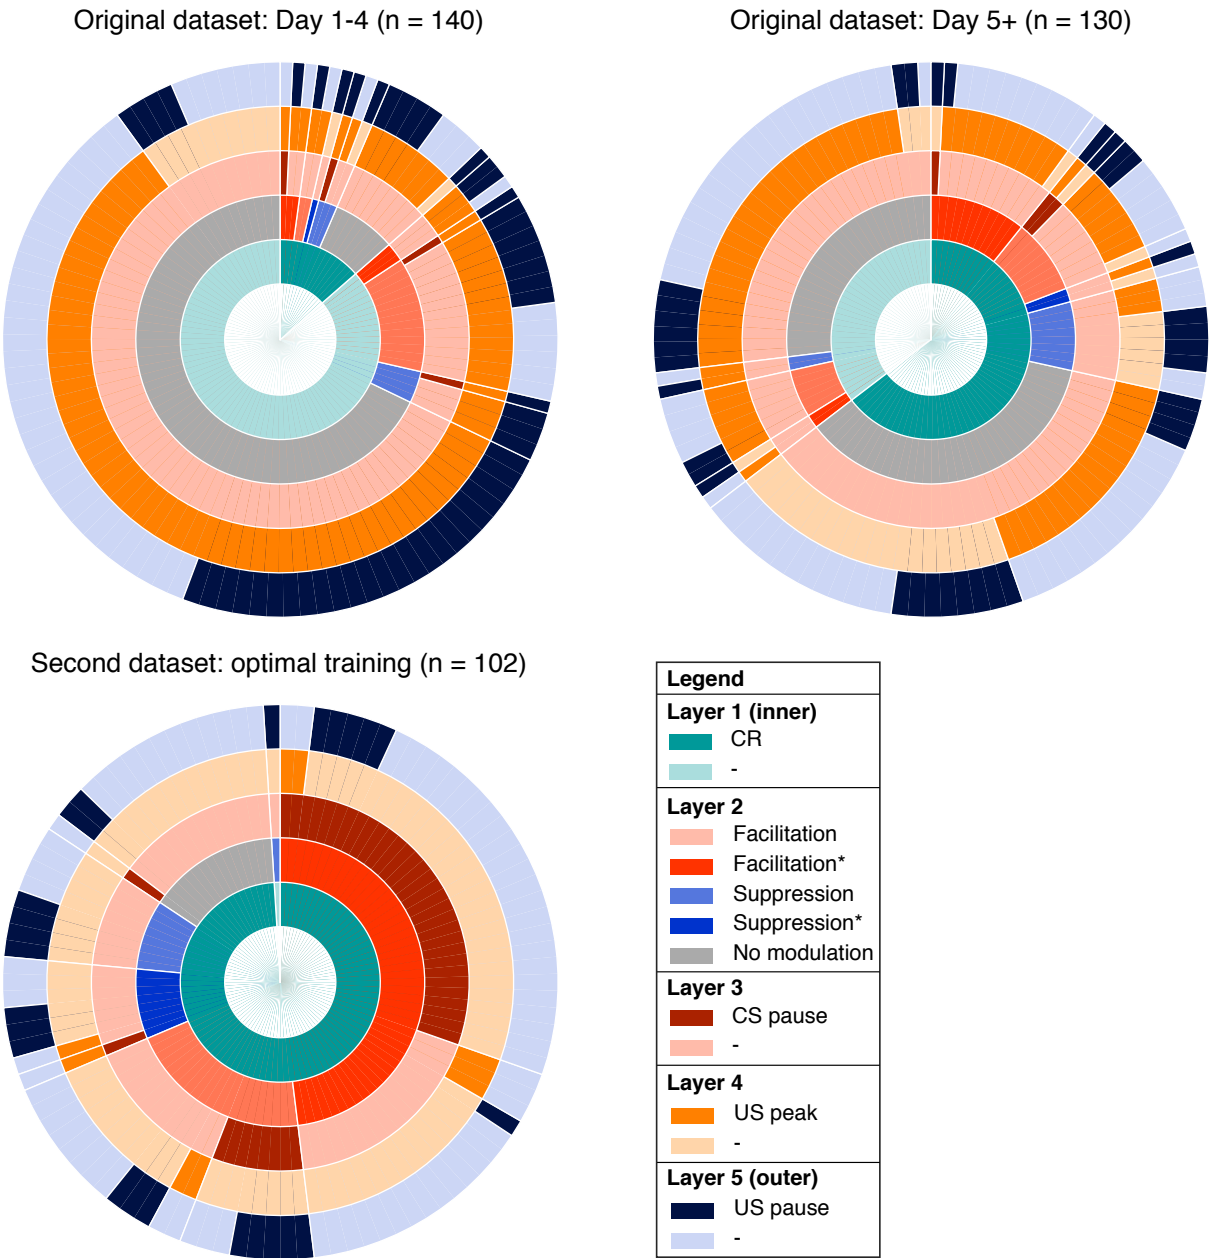

Supplement: supp [file elife-28132-supp-v1.zip]

Figure 5S

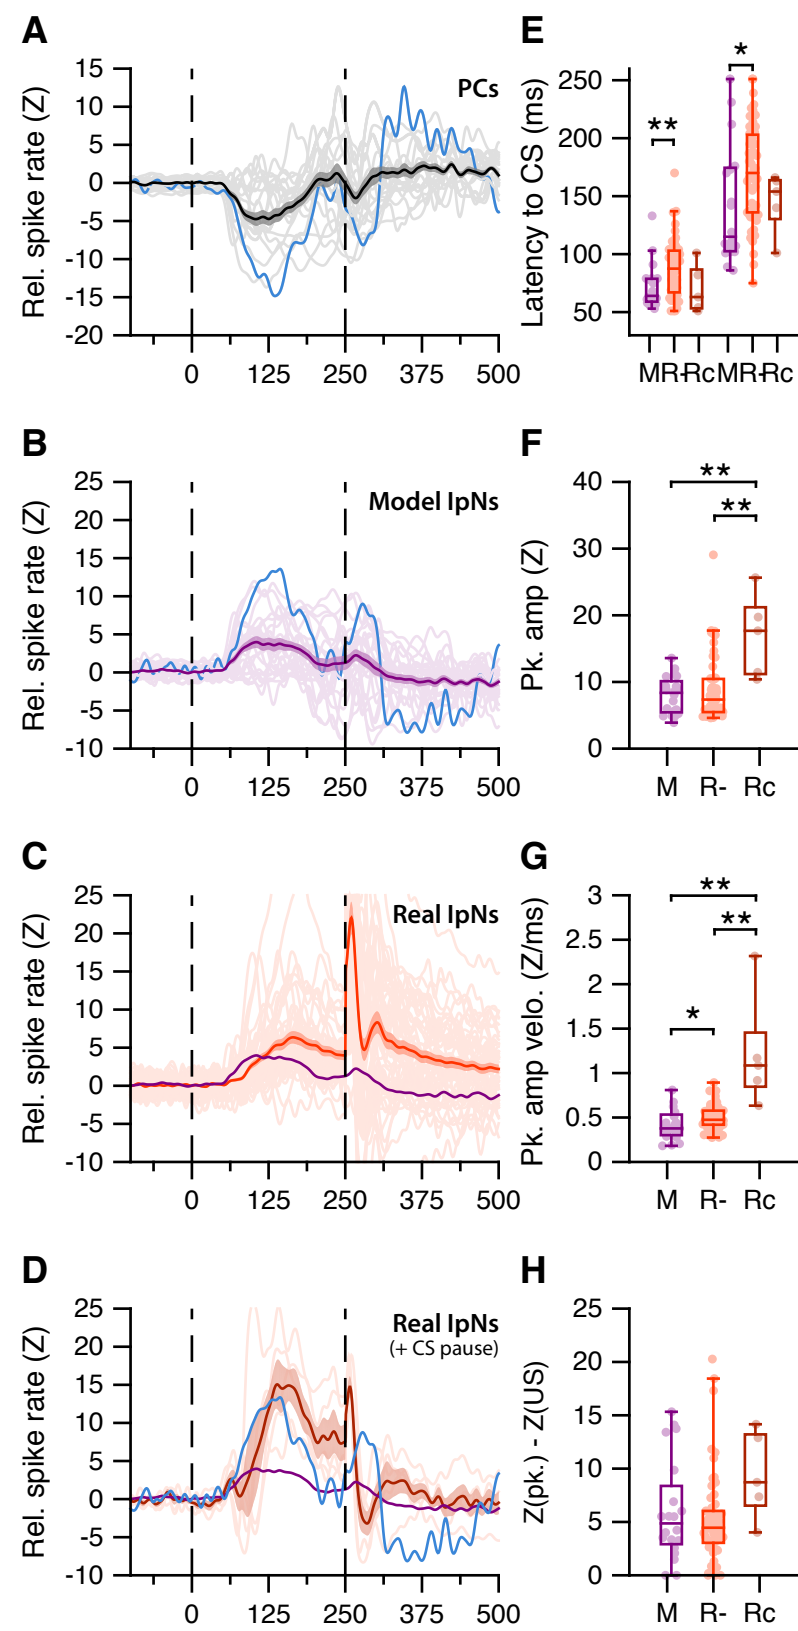

Supplement: supp [file elife-28132-supp-v1.zip]

Figure 6S

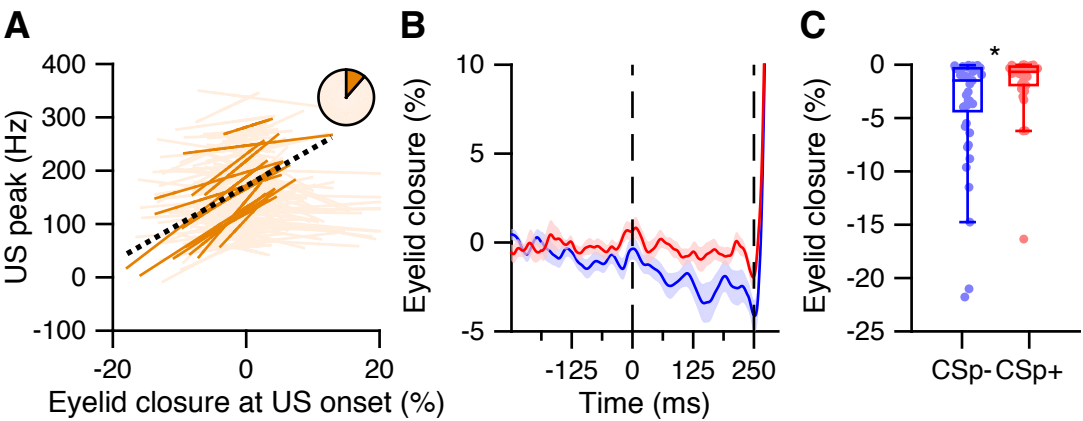

Supplement: supp [file elife-28132-supp-v1.zip]

Figure 2S

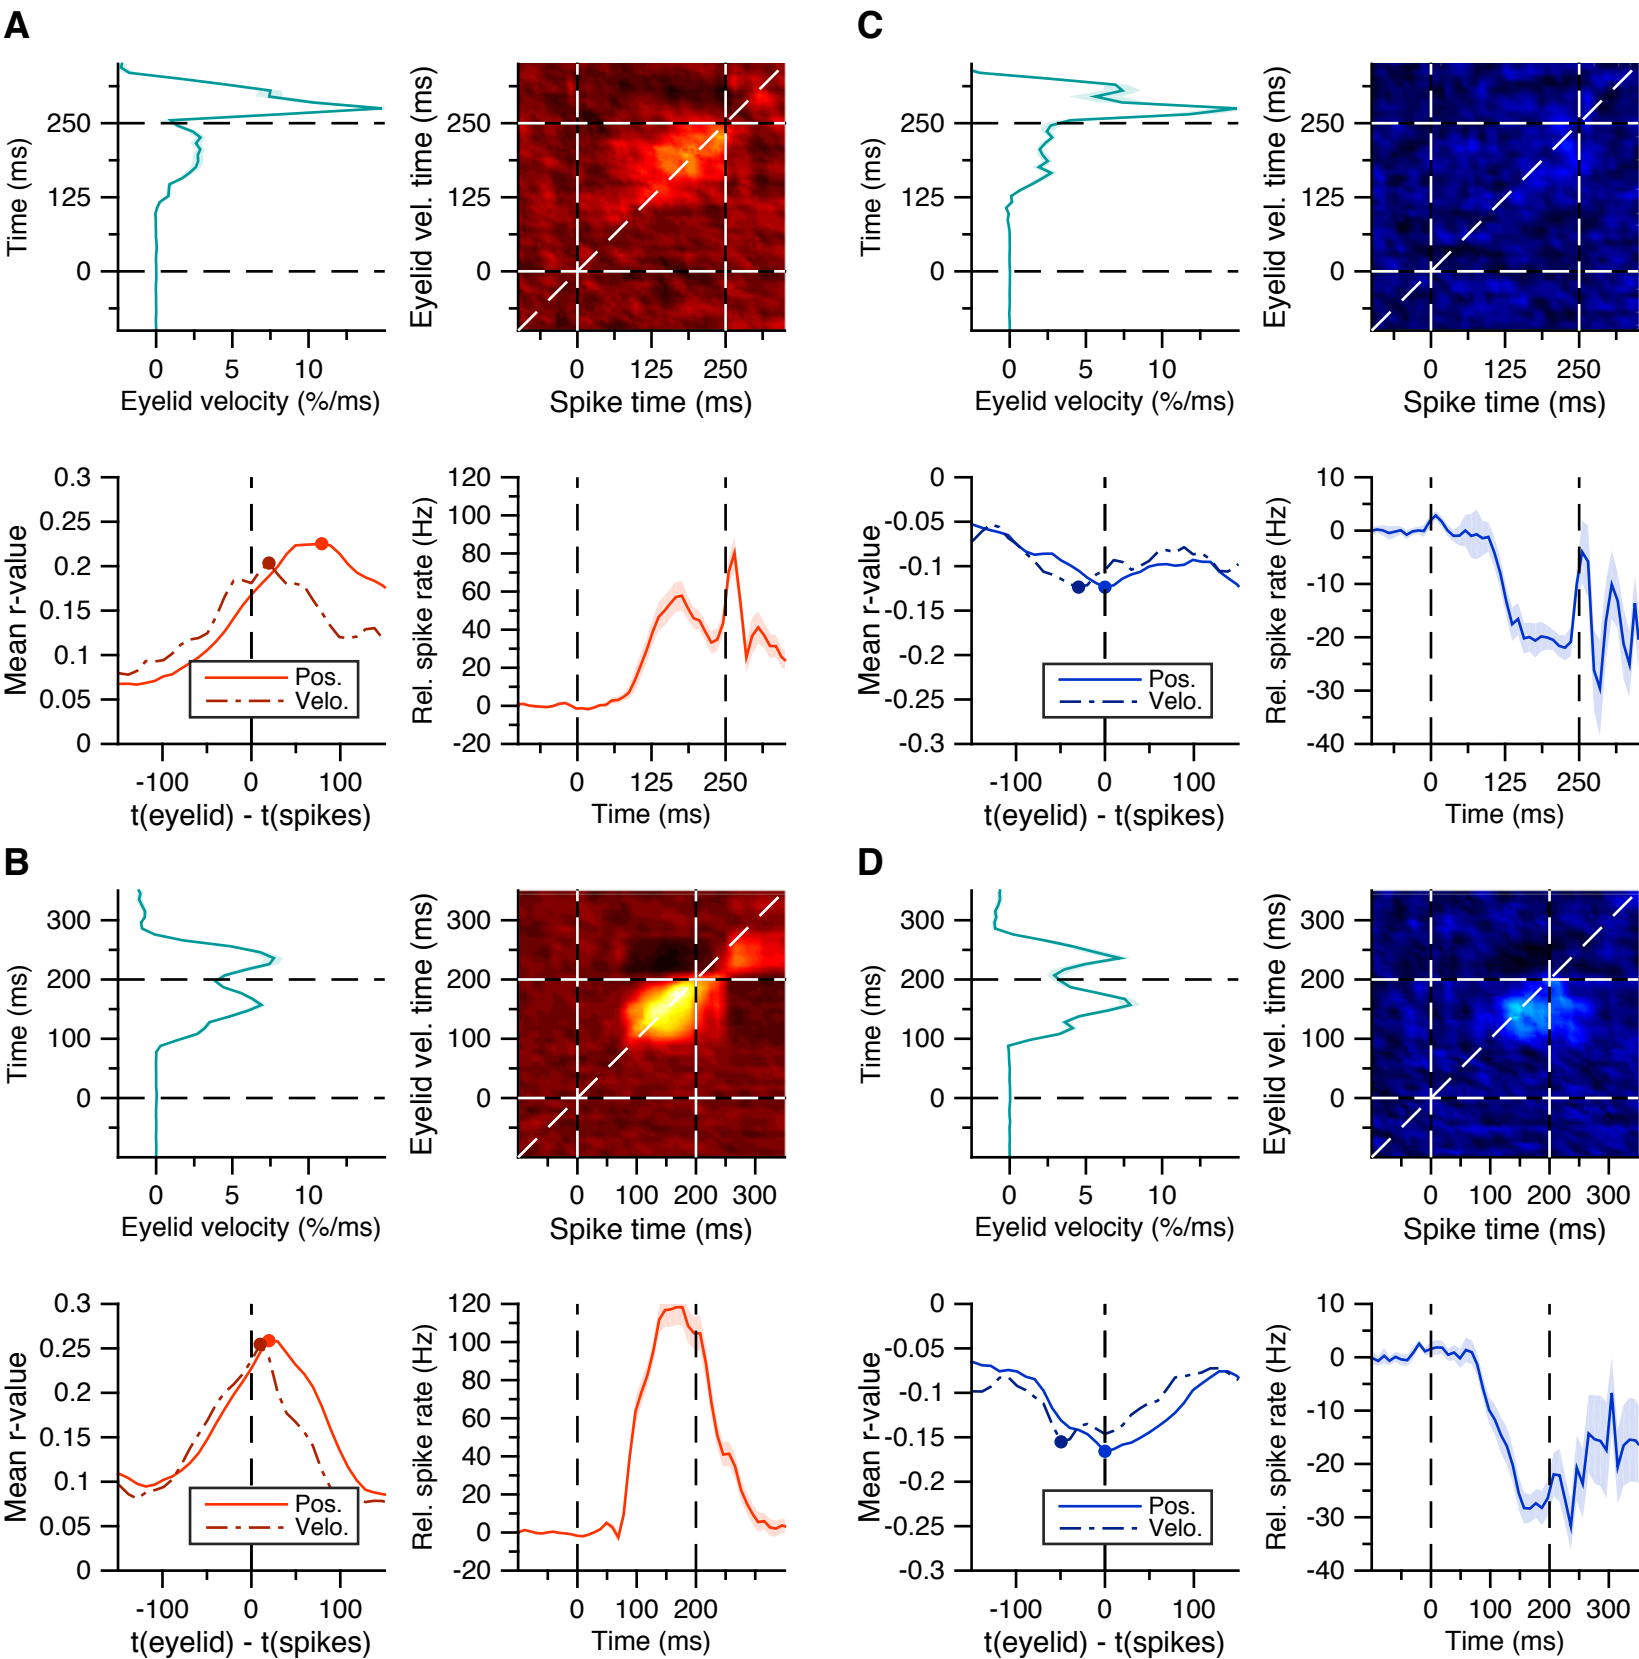

Supplement: supp [file elife-28132-supp-v1.zip]

Figure 7S

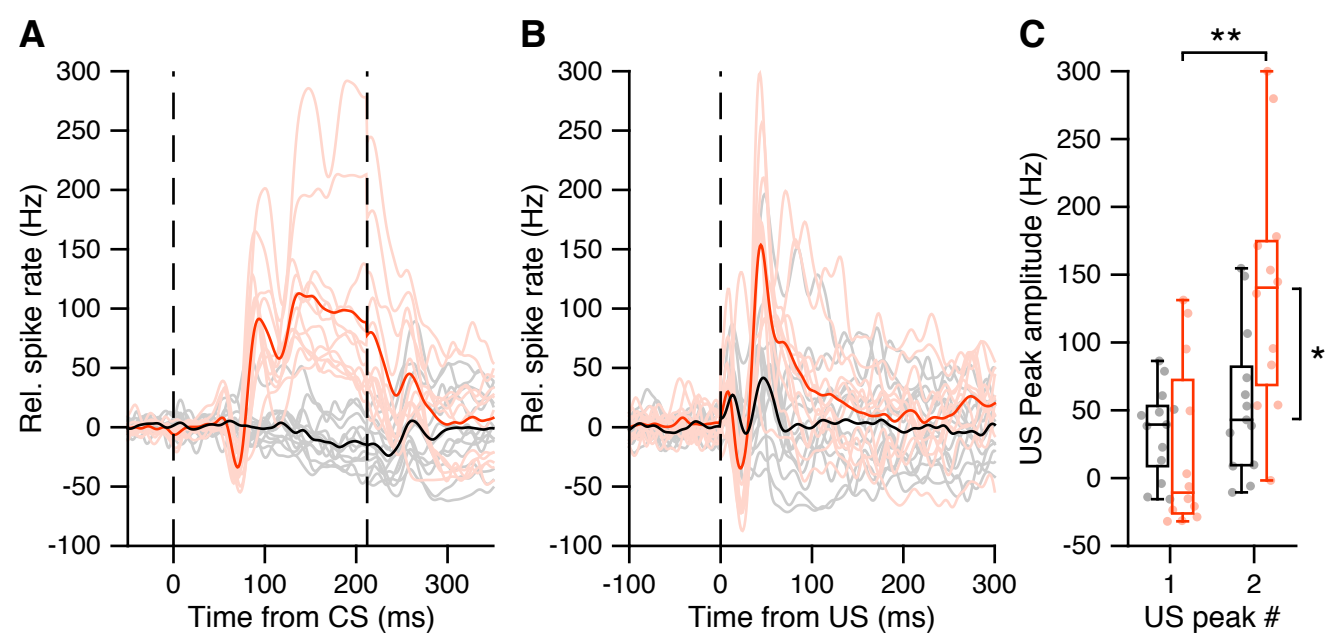

Supplement: supp [file elife-28132-supp-v1.zip]

Figure 4S

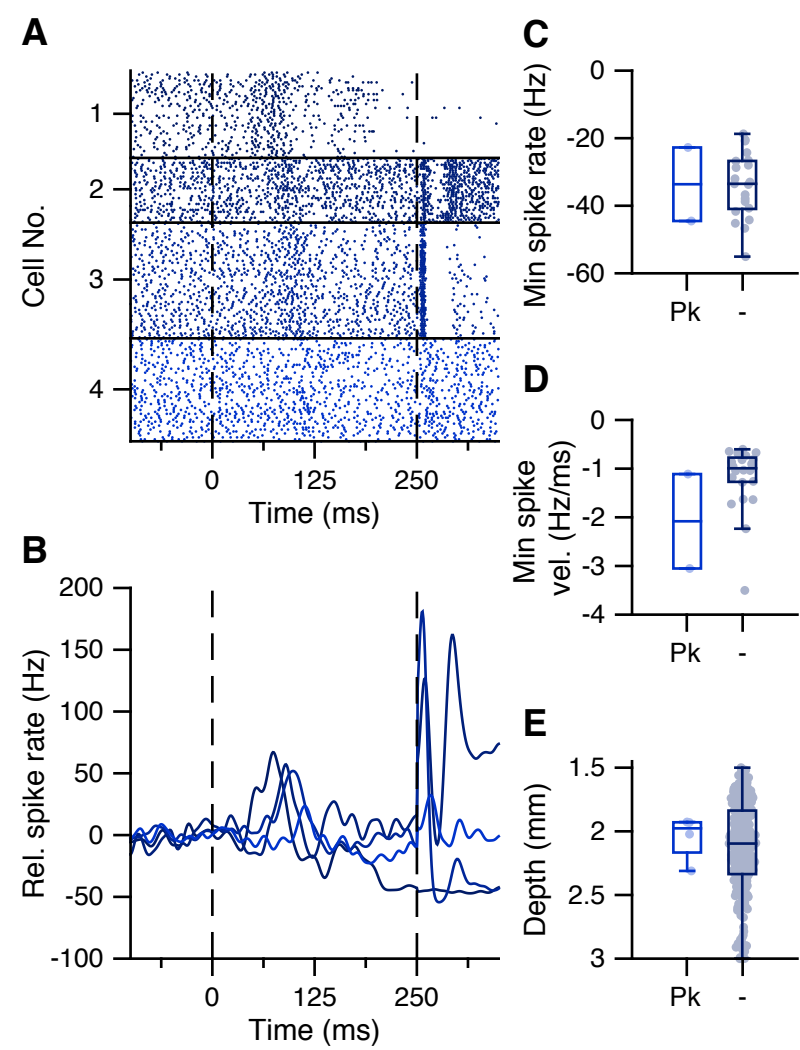

Supplement: supp [file elife-28132-supp-v1.zip]
